# Supplementary material
Source: MDPI journal article supplement (https://www.mdpi.com/1999-4907/14/6/1100)
Supplement: s1 [file s1 › forests-2336245-supplementary.pdf]

## Supplementary materials

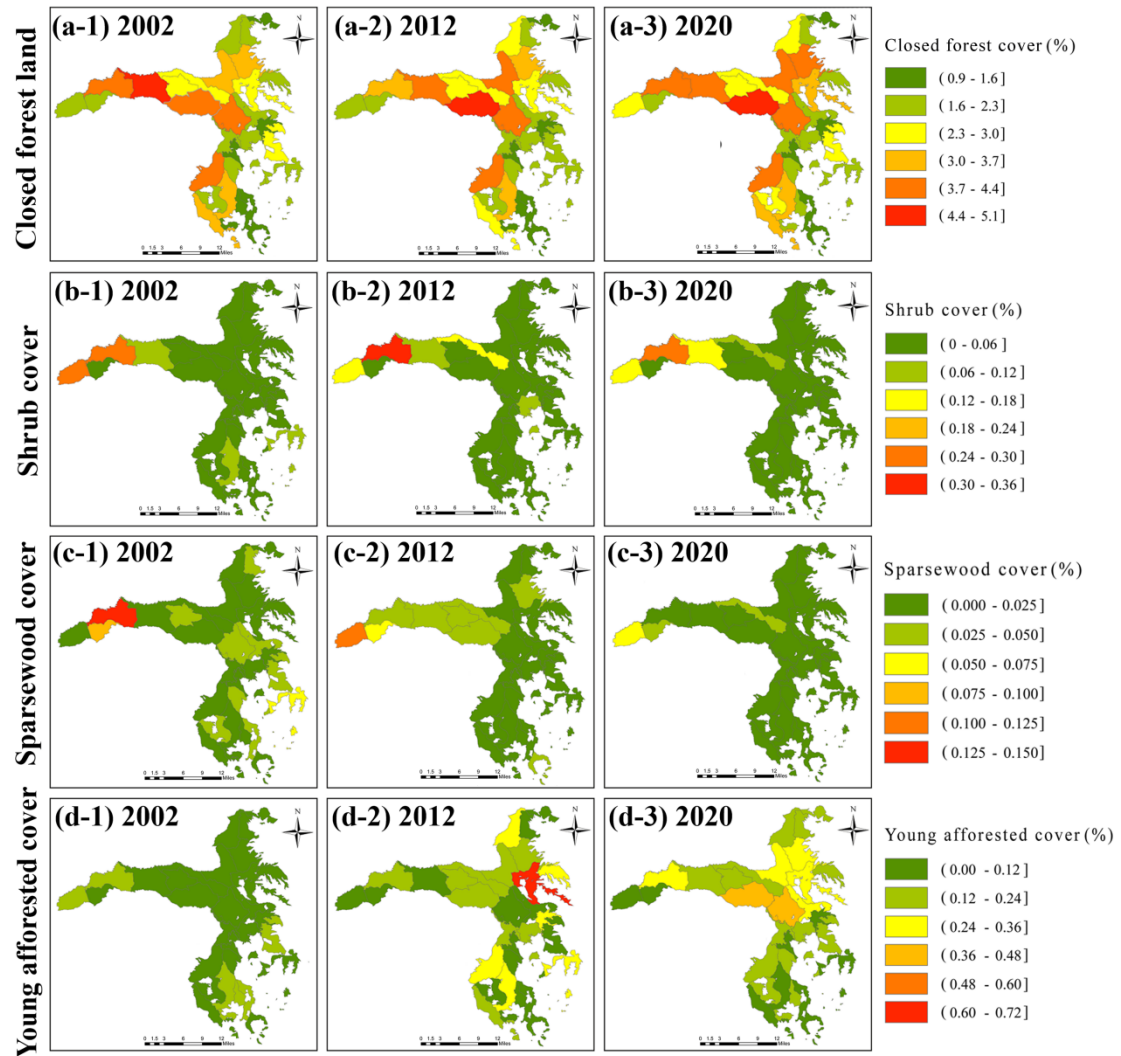

**Supplementary Figure S1** Spatial patterns of different forest types in the Saihanba for 2002, 2012, and 2020.

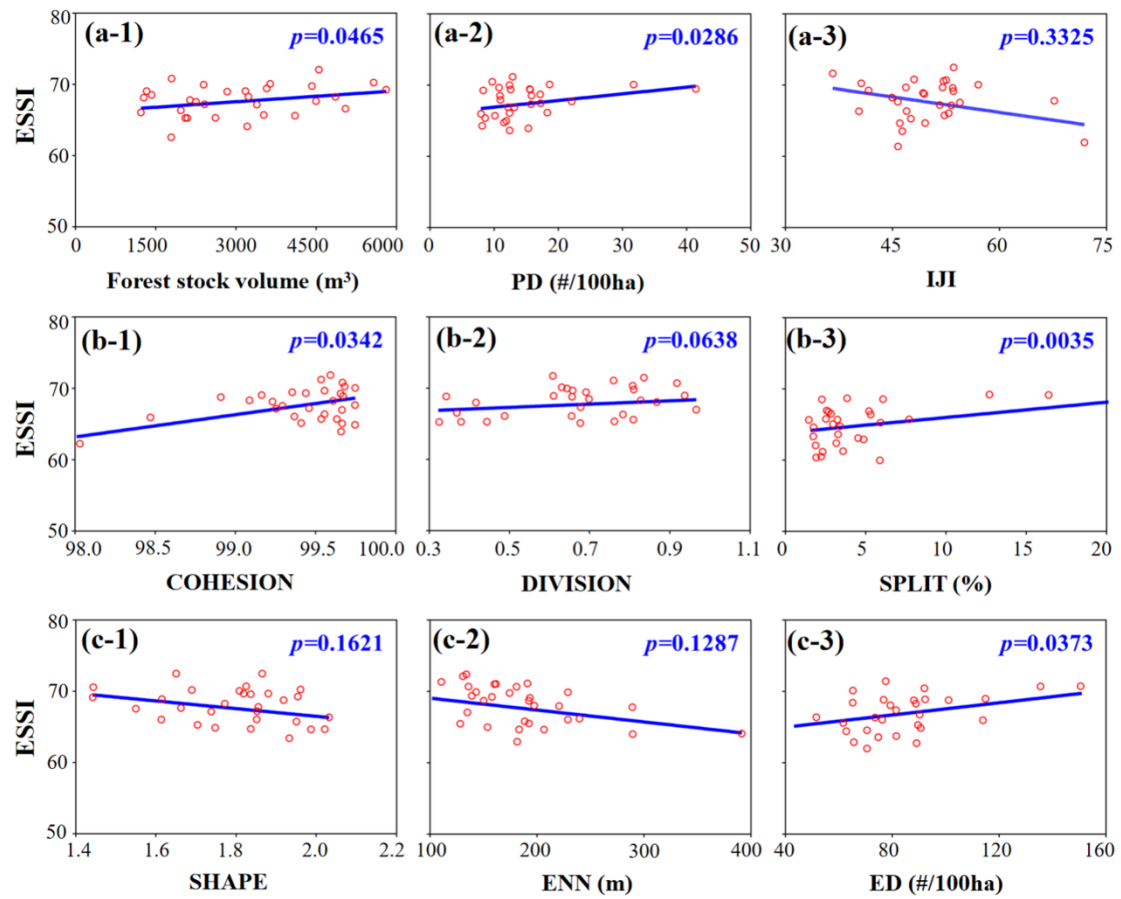

**Supplementary Figure S2.** Correlations between the ESSI, forest stock volume and landscape, metrics.

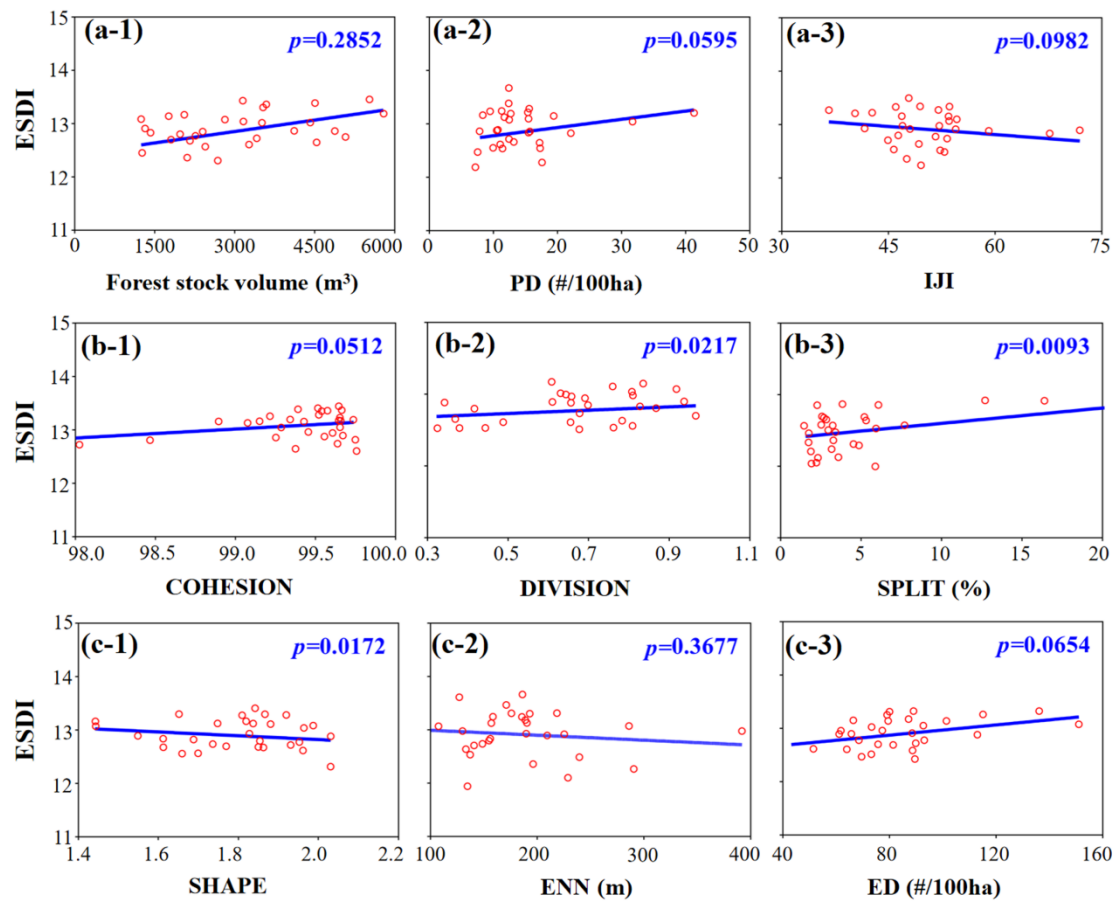

**Supplementary Figure S3.** Correlations between the ESDI, forest stock volume and landscape metrics.

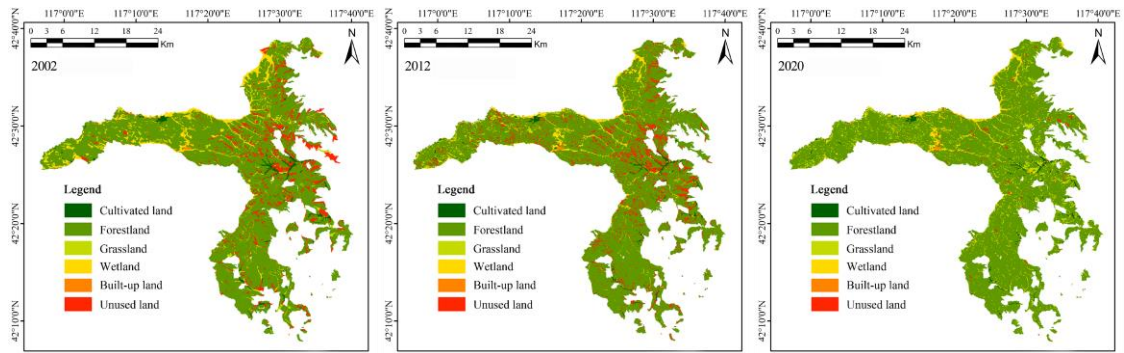

**Supplementary Figure S4.** LUCC maps in Saihanba for 2002, 2012, and 2020.

**Supplementary Table S1** Characteristics of primary and secondary classification system of the LUCC classifications.

| Primary types   | Secondary types              | Explanations                                                                                                               |
|-----------------|------------------------------|----------------------------------------------------------------------------------------------------------------------------|
| Cultivated land | Arid land                    | The cultivated land that lacks an irrigation water source and facilities, relying on natural water to grow crops.          |
| Forestland      | Closed forest land           | Natural and artificial forests with crown density above 30%, including timber, economic, and protective forests, etc.      |
|                 | Shrub land                   | Bushes with a crown density higher than 30% and less than 2 m in height.                                                   |
|                 | Sparsewood land              | Natural and artificial forests with crown densities of forests between 10% and 30%                                         |
|                 | Young afforested land        | Land that has been afforested for less than 3-5 a or less than 7-10 a after fly-seeding.                                   |
| Grassland       | Cut-over land                | Land that has not been replanted with trees after forest harvesting or fire.                                               |
|                 | Highly covered grassland     | Natural, improved or mowed grasslands with more than 50% cover, which generally have better moisture conditions            |
|                 | Moderately covered grassland | Natural or improved grasslands with a cover of between 20% and 50%, which typically have insufficient moisture conditions. |
| Wetland         | Low covered grassland        | Natural grasslands with a cover between 5% and 20% have a poor utilization value for grazing.                              |
|                 | River                        | Natural or artificially excavated rivers.                                                                                  |
|                 | Lakes                        | Natural waterlogged areas.                                                                                                 |
| Built-up land   | Swampland                    | Muddy areas that are subject to prolonged waterlogging.                                                                    |
|                 | Urban construction land      | Land in the built-up areas of large, medium, and small cities, as well as at county and town levels.                       |
|                 | Rural settlements            | Rural settlements that are independent of urban areas.                                                                     |
| Unused land     | Others                       | Land for factories, mines, and industrial zones etc.                                                                       |
|                 | Bare soil                    | Land with less than 5% surface soil cover and less than 5% vegetation cover.                                               |
|                 | Bare rock                    | Land covered by rock or gravel with an area of more than 5%.                                                               |

**Supplementary Table S2** The selected typical landscape indicators of Saihanba.

| Landscape indexes                               | Level           | Formulas                                                                                                                                                                             | Descriptions                                                                                          |
|-------------------------------------------------|-----------------|--------------------------------------------------------------------------------------------------------------------------------------------------------------------------------------|-------------------------------------------------------------------------------------------------------|
| Patch density (PD)                              | Class/Landscape | $PD = \frac{N}{A}$                                                                                                                                                                   | N: total number of patches in the landscape<br>A: total landscape area                                |
| Interspersion<br>juxtaposition index<br>(IJI)   | Class/Landscape | $IJI = \frac{-\sum_{k=1}^m \left[ \frac{e_{ik}}{\sum_{k=1}^m e_{ik}} \ln \left( \frac{e_{ik}}{\sum_{k=1}^m e_{ik}} \right) \right]}{\ln(m-1)} \times 100\%$                          | $e_{ik}$ : total length of the edges between patch types $i$ and $k$ .<br>$m$ : number of patch types |
| Patch cohesion index<br>(COHESION)              | Class/Landscape | $COHESION = \left[ 1 - \frac{\sum_{i=1}^m \sum_{j=1}^n p_{ij}}{\sum_{i=1}^m \sum_{j=1}^n P_{ij} \sqrt{a_{ij}}} \right] \times \left[ 1 - \frac{1}{\sqrt{A}} \right]^{-1} \times 100$ | $a^{ij}$ : area of patch $ij$<br>$p^{ij}$ : perimeter of patch $ij$                                   |
| Landscape division<br>index (DIVISION)          | Class/Landscape | $DIVISION = 1 - \sum_{i=1}^m \sum_{j=1}^n \left( \frac{a_{ij}}{A} \right)$                                                                                                           | $a^{ij}$ : area of patch $ij$<br>A: total landscape area                                              |
| Splitting index (SPLIT)                         | Class/Landscape | $SPLIT = \frac{A^2}{\sum_{i=1}^m \sum_{j=1}^n a_{ij}^2}$                                                                                                                             | $a^{ij}$ : area of patch $ij$<br>A: total landscape area                                              |
| Shape index (SHAPE)                             | Patch           | $SHAPE = \frac{0.25p_{ij}}{\sqrt{a_{ij}}}$                                                                                                                                           | $a^{ij}$ : area of patch $ij$<br>$p^{ij}$ : perimeter of patch $ij$                                   |
| Euclidean nearest<br>neighbor distance<br>(ENN) | Patch           | $ENN = h_{ij}$                                                                                                                                                                       | $h_{ij}$ : distance between patch $ij$ and the nearest neighboring patch of the same class.           |
| Edge density (ED)                               | Class/Landscape | $ED = \frac{E}{A} \times 10^{-6}$                                                                                                                                                    | E: total length of the edge in the landscape                                                          |

**Supplementary Table S3** Rationales and potential indicators of ecosystem services

| ES type            | Title                                  | Rationales                                                                                                                                                                                                     | Potential indicators                                                                                      |
|--------------------|----------------------------------------|----------------------------------------------------------------------------------------------------------------------------------------------------------------------------------------------------------------|-----------------------------------------------------------------------------------------------------------|
| Regulating service | Local climate regulation               | Changes in land cover can have an impact on local temperature, wind, radiation, and precipitation.                                                                                                             | Temperature, precipitation, wind; temperature amplitudes; evapotranspiration                              |
|                    | Air quality regulation                 | The capacity of ecosystems to remove heavy metals, pathogens, and other hazardous substances from the atmosphere.                                                                                              | Leaf surface microstructural indexes; TSP; PM <sub>2.5</sub> ; PM <sub>10</sub>                           |
|                    | Water source regulation                | Ecosystem can effectively redistribute precipitation through the forest canopy, litter, and soil layer, thereby acting as a regulator for the water storage and runoff.                                        | Precipitation; forest canopy interception rate; forest canopy density                                     |
|                    | Water purification                     | The ecosystem can not only purify water but may also negatively impact its quality.                                                                                                                            | Quality of water                                                                                          |
|                    | Erosion regulation                     | Vegetation is critical for soil conservation and the prevention of landslides.                                                                                                                                 | Soil erosion caused by wind or water; vegetation coverage                                                 |
|                    | Pollination                            | Changes in ecosystems affect not only the distribution, abundance, and effectiveness of pollinators, but also the direction and power of wind, which can affect wind-borne plant pollination.                  | Reproduction of plants; Efficiency of pollination                                                         |
|                    | Control of pests and diseases          | Alterations in vegetation cover, temperature, and moisture can directly affect the population dynamics of pests and their natural enemies and could also have effects in the spread rate of pathogens/viruses. | Infection rate; spread rate; control effect; reduction in biomass; insect population density; lesion size |
| Providing service  | Forest carbon sinks                    | Plants can absorb CO <sub>2</sub> from the atmosphere and sequester it within themselves or in the soil, thereby reducing the concentration of greenhouse gas of the environment.                              | Forest cover; forest stock; forest vegetation carbon stock                                                |
|                    | Crops and fodder                       | Cultivation of edible plants for human and animals, respectively.                                                                                                                                              | Plants biomass/ha; kJ/ha                                                                                  |
|                    | Wild foods                             | Harvest of wild plants such as berries and mushrooms.                                                                                                                                                          | Plants biomass/ha; kJ/ha                                                                                  |
|                    | Biochemicals and medicine              | Production of biochemicals or medicines (Some plants can be used as natural medicines such as <i>Rhodiola Rosea</i> , <i>Trollius chinensis</i> -etc.).                                                        | Types or yield of products; PCs/ha or kg/ha                                                               |
|                    | Freshwater                             | Presence of freshwater.                                                                                                                                                                                        | Liters or m <sup>3</sup> /ha                                                                              |
| Cultural service   | Timber, wood fuel, and energy(biomass) | Trees or plants with a potential use for wood, fuel, and energy                                                                                                                                                | Biomass of wood or plant /ha; kJ/ha                                                                       |
|                    | Forest health recreation               | Specific to the landscape and visual quality of the study area                                                                                                                                                 | Number of tourists and facilities; questionnaires based on personal preferences                           |
|                    | Ecological civilization education      | The forest landscape is used to educate ecological civilization and raise human awareness of protecting the ecological environment.                                                                            | Number of visitors and educational bases.                                                                 |

**Table S4** Assessment of GWR for 2002, 2012, and 2020 in SHB.

| Year | Indicators | OLS     | GWR     |
|------|------------|---------|---------|
| 2002 | AICc       | 232.834 | 188.436 |
|      | $R^2$      | 1.822   | 0.518   |
| 2012 | AICc       | 235.352 | 192.815 |
|      | $R^2$      | 1.560   | 0.933   |
| 2020 | AICc       | 158.382 | 176.700 |
|      | $R^2$      | 0.428   | 0.454   |

Notes: OLS and GWR represent ordinary least squares and geographically weighted regression, respectively.

**Table S5** The spatial proportion of the driving factors influencing Saihanba’s ES balance in 2002, 2012, and 2020.

| Independent variables | Operational area with positive GWR coefficient (%) |        |        |
|-----------------------|----------------------------------------------------|--------|--------|
|                       | 2002                                               | 2012   | 2020   |
| Stand Volume          | 0.00                                               | 50.00  | 100.00 |
| PD                    | 0.00                                               | 100.00 | 100.00 |
| IJI                   | 100.00                                             | 100.00 | 100.00 |
| COHESION              | 0.00                                               | 6.67   | 0.00   |
| DIVISION              | 0.00                                               | 20.00  | 100.00 |
| SPLIT                 | 0.00                                               | 0.00   | 100.00 |
| SHAPE                 | 0.00                                               | 0.00   | 100.00 |
| ENN                   | 0.00                                               | 70.00  | 100.00 |
| ED                    | 100.00                                             | 0.00   | 56.67  |
